# Supplementary material for: Regulating the electrochemical behaviours of a hierarchically structured Co3(PO4)2/Ni–Co–O for a high-performance all-solid-state supercapacitor
Source: Royal Society of Chemistry journal article supplement (doi:10.1039/d0dt01818j), 2020-01-01
Supplement: d0dt01818j1.pdf [file d0dt01818j1.pdf]

Electronic Supplementary Information for

**Regulation of Electrochemical Behaviors of Hierarchical  
Structured  $\text{Co}_3(\text{PO}_4)_2/\text{Ni-Co-O}$  for High-performance All-solid-  
state Supercapacitor**

Tianxiang Yan,<sup>a</sup> Hanfang Feng,<sup>a</sup> Xueying Ma,<sup>a</sup> Lifeng Han,<sup>a,c</sup> Li Zhang<sup>\*a,b</sup> and Shaokui Cao<sup>\*a,b</sup>

<sup>a</sup>School of Materials Science and Engineering, Zhengzhou University, Zhengzhou 450001, People's Republic of China

<sup>b</sup>Henan Key Laboratory of Advanced Nylon Materials and Application, Zhengzhou University, Zhengzhou 450001, People's Republic of China.

<sup>c</sup>College of Materials and Chemical Engineering, Zhengzhou University of Light Industry, Zhengzhou 450002, People's Republic of China.

## Experimental Section

### Materials

Graphite powder (325 meshes) was bought from Qingdao Huatai Lubricant sealing S&T Co. Ltd. (Qingdao, China). Ferrite chloride hexahydrate ( $\text{FeCl}_3$ , 99.9%, metals basis), sodium hypophosphite ( $\text{NaH}_2\text{PO}_2 \cdot \text{H}_2\text{O}$ , 99.9%, metals basis), dipotassium hydrogen phosphate ( $\text{K}_2\text{HPO}_4$ , 99.9%, metals basis), cobalt chloride hexahydrate ( $\text{CoCl}_2 \cdot 6\text{H}_2\text{O}$ , 99.9%, metals basis) were obtained from Beijing Chemical Reagent Factory (Beijing, China). Ni foam (NF, purity: 98%, thickness: 0.5 mm, mass density:  $26 \text{ mg cm}^{-2}$ ) was purchased from Suzhou Taili Metal Foam Factory (Suzhou, China). All other reagents are of analytic grade, used as received without purification, and purchased from Shanghai Macklin Biochemical Co., Ltd.

### Synthesis of $\text{Co}_3(\text{PO}_4)_2/\text{Ni-Co-O@NF}$ (CPNO-12) hierarchical structure

$\text{CoCl}_2 \cdot 6\text{H}_2\text{O}$  (0.285 g, 1.2 mmol),  $\text{K}_2\text{HPO}_4$  (0.137 g, 0.6 mmol) were dissolved in 10 mL distilled water and stirred vigorously for 0.5 hour to form a pink solution, afterwise the solution was transferred into a 20 mL Teflon-lined stainless autoclave with pure NF as supporter and collector, which was sealed and maintained at  $150 \text{ }^\circ\text{C}$  for 12 hours and then allowed to cool to room temperature. In order to remove the surface NiO layer, NF (approximately  $3 \text{ cm} \times 1 \text{ cm}$ ) was carefully cleaned with concentrated HCl solution (10 wt.%), acetone, absolute ethanol, deionized water (DI) in an ultrasound bath for 0.5 hour, respectively. CPNO with various reaction time were also prepared and noted as CPNO- $x$  ( $x=3, 9, 12$  and  $15$ ) depending on reaction hours. CPN- $x$  ( $x=1, 1.5$ ) were obtained under same condition as CPNO-12, except the ratio of cobalt to phosphate source: 1 and 1.5, respectively. All samples as-prepared were rinsed several times with distilled water and ethanol with the assistance of ultrasonication, and dried at  $80 \text{ }^\circ\text{C}$  for 6 hours.

### Synthesis of $\text{Fe}_2\text{P}/\text{graphene hydrogel@NF}$ (FPGH)

Graphene Oxide (GO) was prepared by the oxidation of natural graphite powder using a modified Hummers method. The 5 mL graphene solution ( $2 \text{ mg mL}^{-1}$ ) and cleaned NF were transferred into a 20 mL autoclave and maintained at  $180 \text{ }^\circ\text{C}$  for 12 hours to form a graphene hydrogel on NF. Then  $\text{FeCl}_3$  (0.163 g, 1 mmol) and urea (1.2 g, 20 mmol) were dissolved in 20 mL distilled water and stirred to form a brown solution. Then as-prepared samples and the brown solution were transferred into a 20 mL Teflon-lined stainless-steel autoclave, which was sealed and maintained at  $100 \text{ }^\circ\text{C}$  for 6 hours. Materials collected were rinsed several times with distilled water and ethanol with the assistance of ultrasonication, and dried at room temperature. Finally, the sample mixed with  $\text{NaH}_2\text{PO}_2 \cdot \text{H}_2\text{O}$  (0.5 g, 5 mmol) were put into a quartz tube and annealed at 573 K for 2 hours at Ar atmosphere with a heating rate of  $2 \text{ }^\circ\text{C min}^{-1}$ .

### Measurements

X-ray powder diffraction (XRD) patterns were recorded on an X-ray diffractometer (D8 Advance (Bruker)) at a scan rate of  $10^\circ \text{ min}^{-1}$  in the  $2\theta$  range from  $10^\circ$  to  $80^\circ$ . The morphology and X-ray energy dispersive spectrometer (EDS) analysis of the samples were characterized using a Hitachi S-8000 field-emission scanning electron

microscopy (FE-SEM) equipped with an X-ray energy dispersive spectrometer operating at 20 kV. To disclose the element distribution in CPNO-12, samples were scratched from the NF with knife and grinded for 0.5 hour with the assistance of ultrasonic bath to destroy the outer layer of samples before EDS analysis. High-resolution transmission electron microscopy (HRTEM) measurements were carried out using a JEOL model JEM 2010 EX microscopy at 200 kV. X-ray photoelectron spectroscopy (XPS) was carried out using an ESCALAB 250 photoelectron spectrometer (Thermo Fisher Scientific) with Al Ka (1486.6 eV) as the X-ray source set at 150 W and a pass energy of 30 eV for high resolution scan. BET surface area measurements were carried out using a Quantachrome Quadrasorb SI analyser. Raman spectra were collected from using a Raman Station (B&WTEK, BWS435-532SY) with a laser operating at 532 nm.

### **Three-electrode electrochemical tests**

The electrochemical measurements were carried out at 298 K in a three-electrode glass cell connected to an electrochemical workstation. The active materials prepared in-situ on the NF (1 cm × 1 cm × 0.5 mm) were directly used as the working electrodes. A platinum electrode and an Hg/HgO electrode were used as counter and reference electrodes, respectively. Freshly prepared 1 M KOH aqueous solution was used as the electrolyte. CV curves (0~0.5 V, -1.2 V~0 for CPNO-12 and FPGH) and EIS (from 100 kHz to 10 mHz at open circuit voltage) spectra were recorded using an electrochemical workstation (CHI 660E). The GCD experiments were studied in a potential range of 0~0.5 V and -1.2 V~0 (vs Hg/HgO) for positive electrodes and negative electrodes, respectively.

### **All-solid-state asymmetric supercapacitors**

All-solid-state asymmetric supercapacitors were fabricated using PVA-KOH gel as electrolyte and CPNO-12, FPGH as electrodes. Since the active materials were constructed in-situ on collectors and gel electrolyte serves as separators as well, extra polymer separators and conductive additive are avoided. The PVA-KOH gel electrolyte was prepared as following: 3.0 g PVA was added into 30 mL deionized water and heated to 90 °C for 60 minutes, then 5 mL KOH (4.5 g) solution was added slowly into the solution under stirring. The positive and negative electrodes were coated with the PVA-KOH gel solution and put into the vacuum oven for 1 hour to ensure full penetration of the as-obtained gel electrolyte. After the excess water was vaporized, the electrodes with solid-state electrolyte were sandwiched and covered with PTFE tape. Then, the flexible all-solid-state supercapacitors was successfully fabricated. Before carrying out electrochemical investigations, the electrodes were immersed in the prepared gel electrolyte for 1 hour. The energy density (E) and power density (P) of as-fabricated devices were calculated according to Equations S1 and Equation S2.

$$E = 1/2CV^2 \quad (S1)$$

$$P = E/t \quad (S2)$$

where  $C$ ,  $V$  and  $t$  refer to capacity, potential window and discharge time, respectively.

## **Theoretical Calculations on Charge Storage Mechanism of CPNO-12**

To understand the charge storage mechanism and determine which electrochemical behavior the CPNO-12 belongs to, theoretical calculations were conducted based on CV curves (as shown in Fig. S7 and Fig. 5c) according to following equations:

$$i_p = av^b \quad (S3)$$

$$\log i = b \log v \quad (S4)$$

where the peak current ( $i_p$ ) obeys the power law relationships with scan rates ( $v$ ),  $a$  and  $b$  refer to adjustable parameters. It's agreed that if  $b$  is equal to 0.5, the electrochemical behavior is dominated by diffusion limited transfer process, termed as diffusion-controlled behavior (DCB); while if  $b=1$ , surface capacitive behavior (SCB) contribute most to the capacitance.<sup>1-3</sup> For analytic purposes, the Equation S3 is simplified to Equation S4 to determine the value of  $b$ ; as plotted in Fig. 4g, value of  $b$  is calculated to be 0.71, indicating the coexistence of DCB and SCB in CPNO-12.

Exact contributions from DCB and SCB has also been calculated based on Equation S5, which can be transformed into a simplified form, Equation S6.

$$i(V) = k_1v + k_2v^{\frac{1}{2}} \quad (S5)$$

$$\frac{i(V)}{v^{\frac{1}{2}}} = k_1v^{\frac{1}{2}} + k_2 \quad (S6)$$

The value of  $k_1v$  and  $k_2v^{1/2}$  represent contributions from CB and DCB, respectively. According to Equation S6, by plotting the  $v$  versus  $i$  at specific potentials, corresponding value of  $k_1$  and  $k_2$  can be determined by slopes and y-axis intercept of straight lines.<sup>[4-7]</sup> Then capacity contributions from SCB in CPNO-12 and CPNO-3 are determined according to the procedure discussed above, the results of which are given in Fig. 4i and Fig. S8.

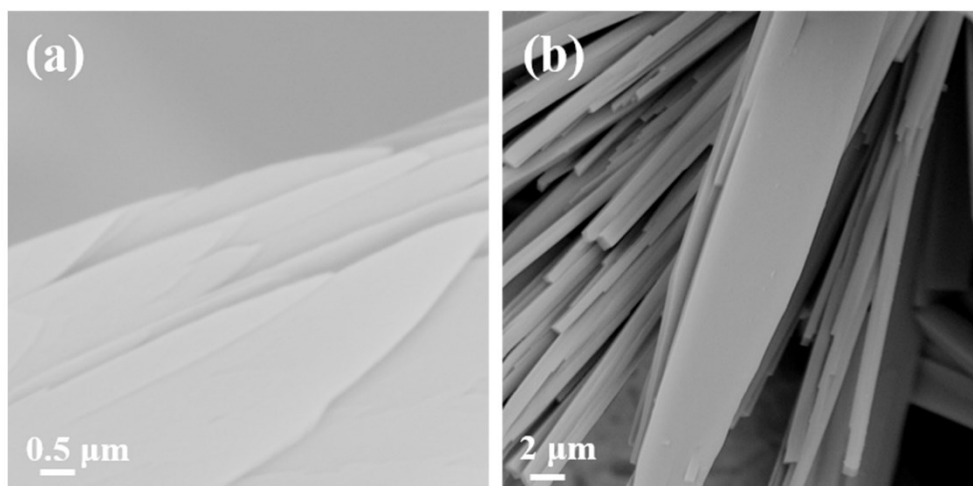

**Fig. S1** SEM images of (a) CPN-1 and (b) CPN-1.5.

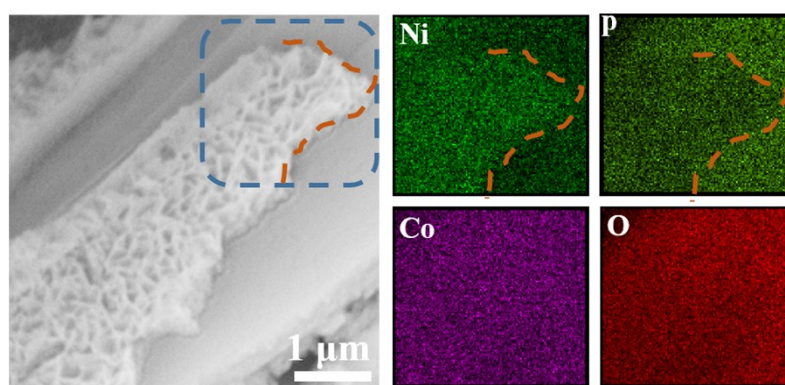

**Fig. S2** SEM images and corresponding EDS analysis of CPNO-12.

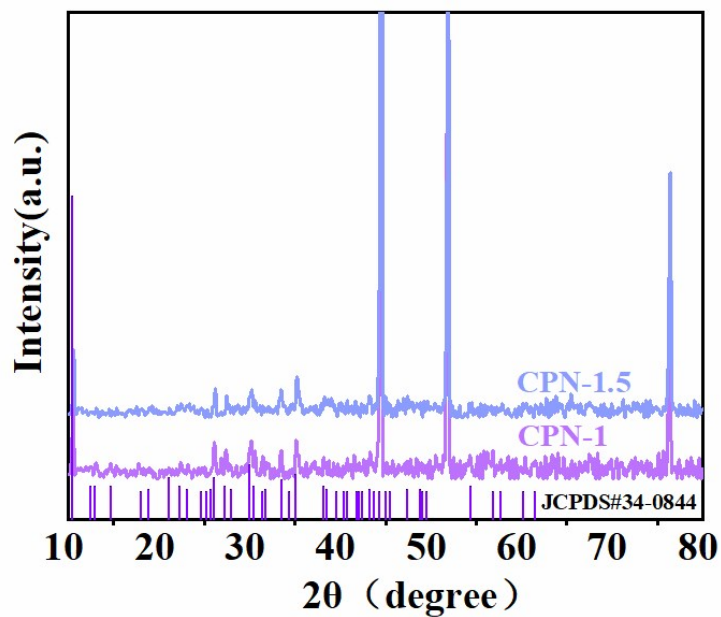

Fig. S3 XRD pattern of CPN-x ( $x=1, 1.5$ ) and corresponding standard data of  $\text{Co}_3(\text{PO}_4)_2 \cdot 4\text{H}_2\text{O}$  (JCDPS No. 34-0844).

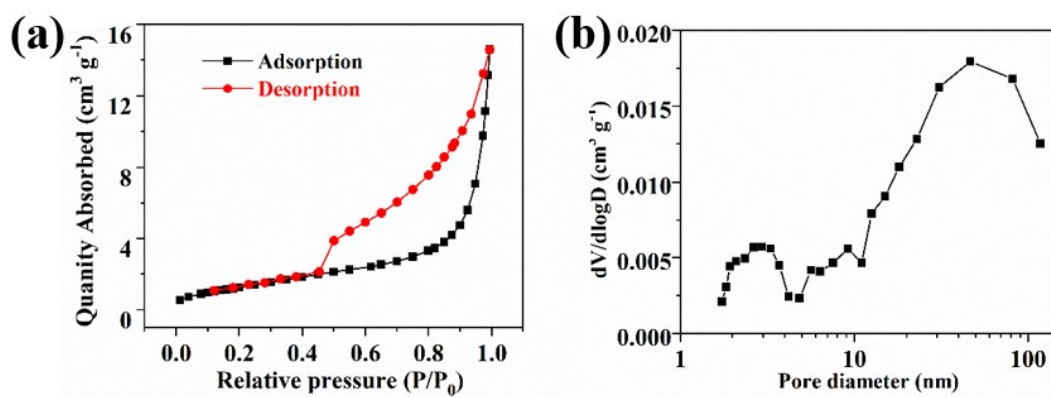

Fig. S4 (a) The  $\text{N}_2$  sorption-desorption isothermal analysis and (b) pore size distribution of CPNO-12.

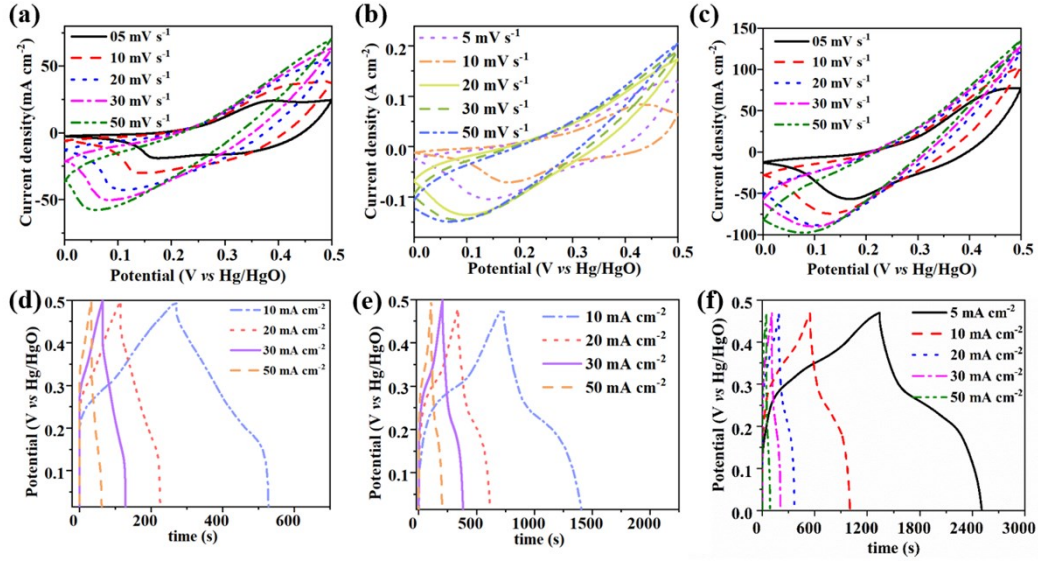

**Fig. S5** CV curves of (a) CPNO-3, (b) CPNO-9, (c) CPNO-15 at various scan rates; GCD curves of (d) CPNO-3, (e) CPNO-9, (f) CPNO-15 at various current density.

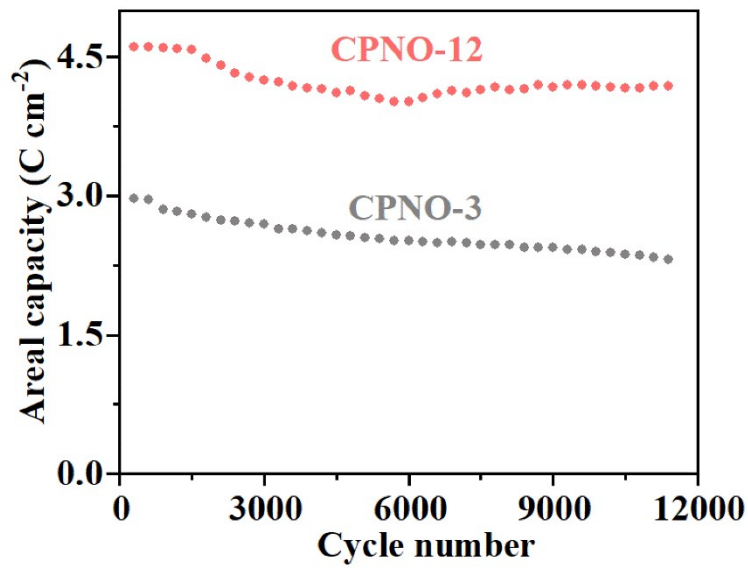

**Fig. S6** Cyclability of CPNO-12 and CPNO-3 at 50 mA cm<sup>-2</sup> after 12000 cycles.

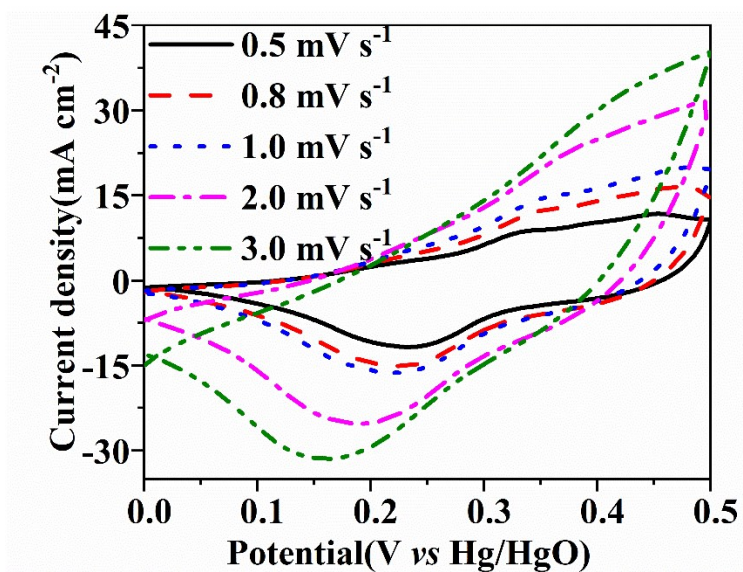

Fig. S7 CV curves of CPNO-12 at low scan rates (0.5~3 mV s<sup>-1</sup>).

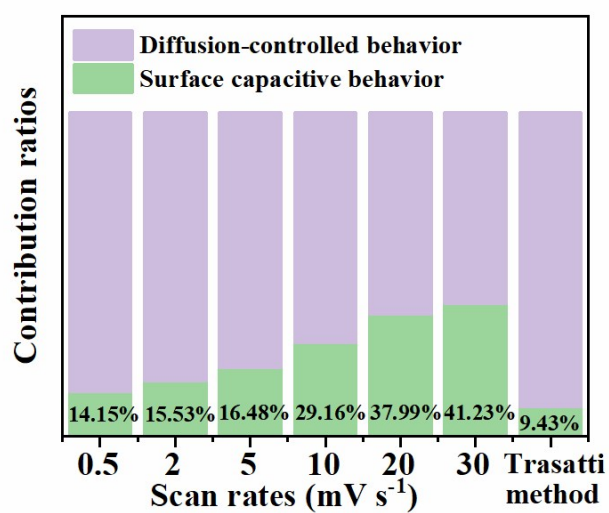

Fig. S8 Capacity contributions from DCB and SCB in CPNO-3.



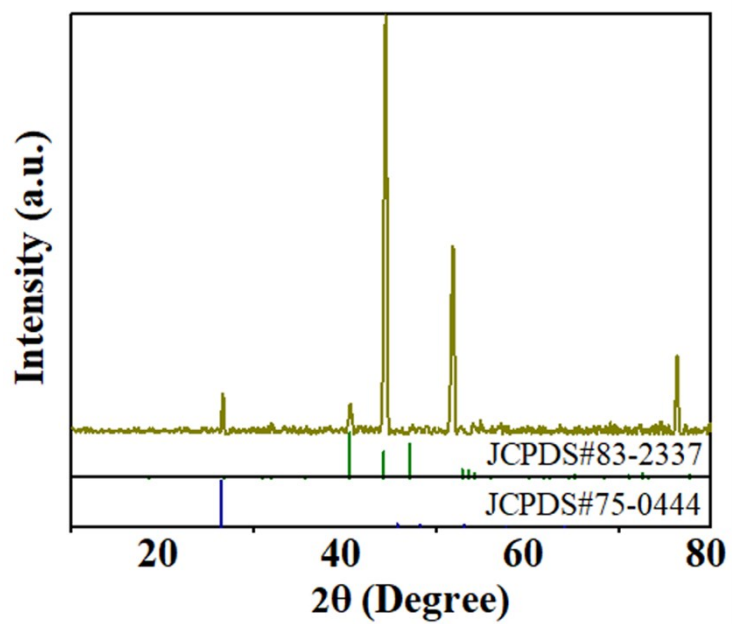

**Fig. S9** XRD pattern of FPGH, and the corresponding standard pattern of Fe<sub>2</sub>P (JCPDS No. 83-2337) and graphite carbon (JCPDS No.75-0444).

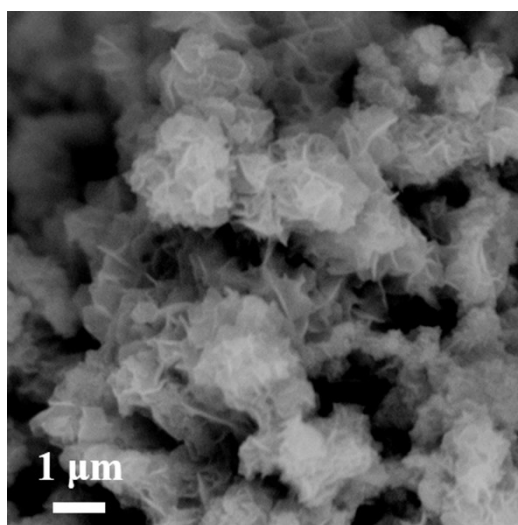

**Fig. S10** SEM image of FPGH.

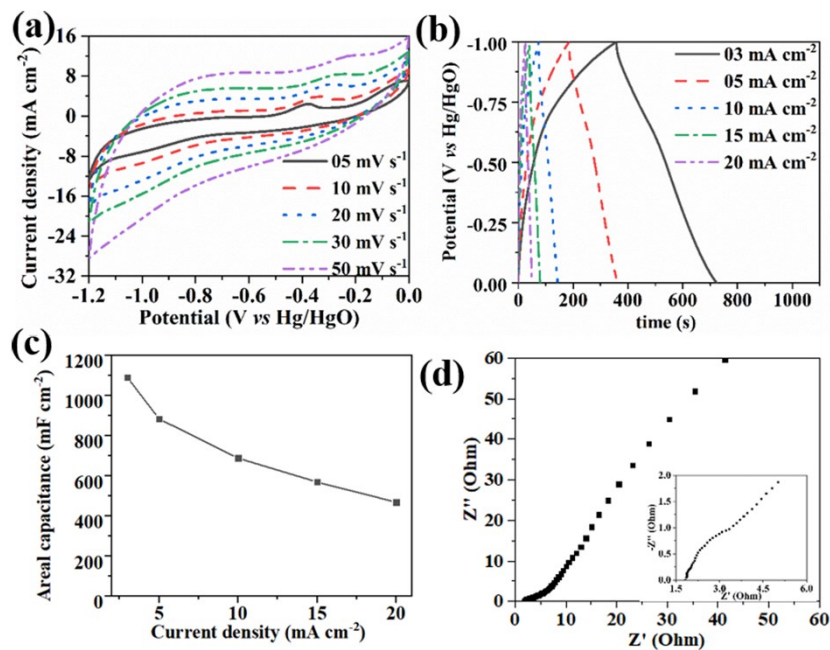

**Fig. S11** Electrochemical performance of FPGH. (a) CV curves and (b) GCD curves of FPGH at various scan rates and current densities, respectively; (c) rate capacity of FPGH; (d) EIS curves of FPGH (inset: EIS curve at high frequency region).

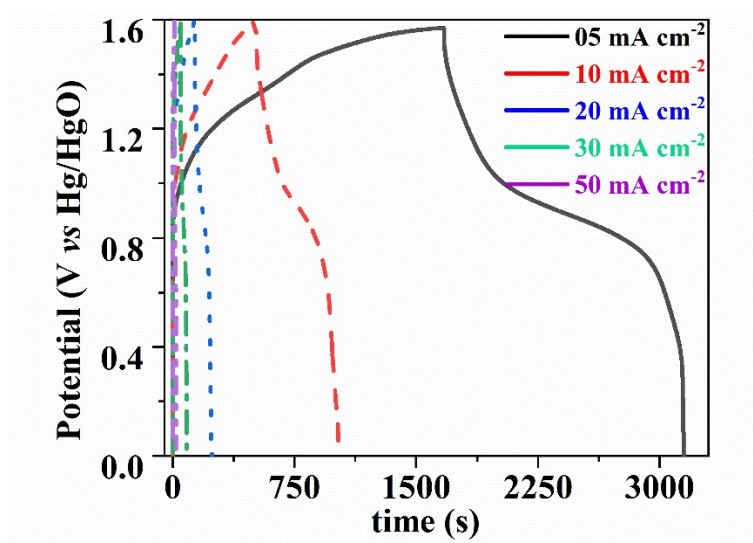

**Fig. S12** GCD curves of CPNO//FPGH ASSSC device at various current density (5–50 mA cm<sup>-2</sup>).

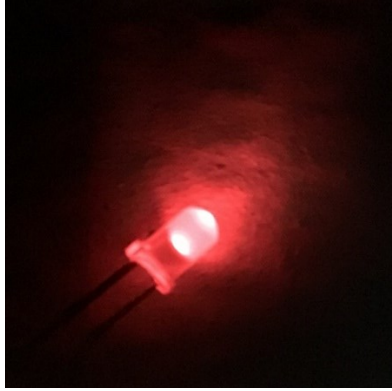

**Fig. S13** The LED powered by solo CPNO//FPGH ASSSC device.

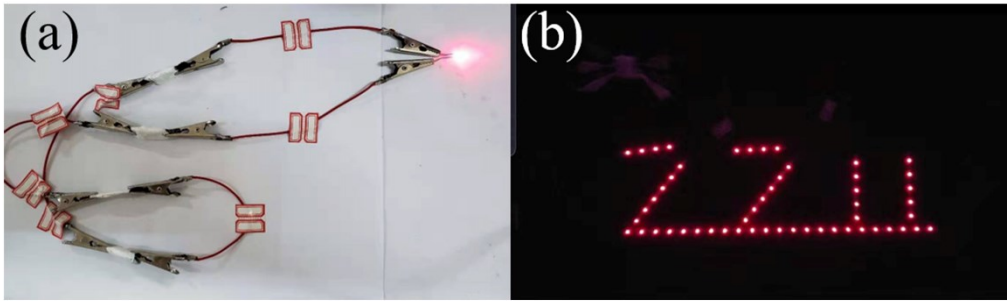

**Fig. S14** (a) the single LED and (b) LED lighting set powered by tandem CPNO//FPGH ASSSC devices.

## Notes and references

1. H. Yin, C. Song, Y. Wang, S. Li, M. Zeng, Z. Zhang, Z. Zhu and K. Yu, *Electrochim. Acta* **2013**, *111*, 762.
2. J. Duay, S. A. Sherrill, E. Gillette and S. B. Lee, *ACS Nano* **2013**, *7*, 1200.
3. X. Yin, C. Zhi, W. Sun, L. P. Lv and Y. Wang, *J. Mater. Chem. A* **2019**, *7*, 7800.
4. G. Zou, H. Hou, J. Hu and X. Ji, *Batteries Supercaps*, **2019**, *2*, 712.
5. T. Brezesinski, J. Wang, J. Polleux, B. Dunn and S. H. Tolbert, *J. Am. Chem. Soc.* **2009**, *131*, 1802.
6. H. S. Kim, J. B. Cook, H. Lin, J. S. Ko, S. H. Tolbert, V. Ozolins and B. Dunn, *Nat. Mater.* **2017**, *16*, 454.
7. K. A. Owusu, L. Qu, J. Li, Z. Wang, K. Zhao, C. Yang, K. M. Hercule, C. Lin, C. Shi, Q. Wei, L. Zhou and L. Mai, *Nat. Commun.* **2017**, *8*, 14264.
